# Supplementary material for: Synthesis of carbon-encapsulated superparamagnetic colloidal nanoparticles with magnetic-responsive photonic crystal property
Source: Royal Society of Chemistry journal article supplement (doi:10.1039/c0dt00621a), 2010-01-01

**Figure captions:**

Figure S1. X-ray diffraction pattern of the as-prepared products.

Figure S2. Raman spectrum of the as-prepared products at the range from 200  $\text{cm}^{-1}$  to 1000  $\text{cm}^{-1}$ .

Figure S3. FT-IR spectrum of the as-prepared products.

Figure S4. Raman spectrum of the as-prepared products at the range from 1000  $\text{cm}^{-1}$  to 1800  $\text{cm}^{-1}$ .

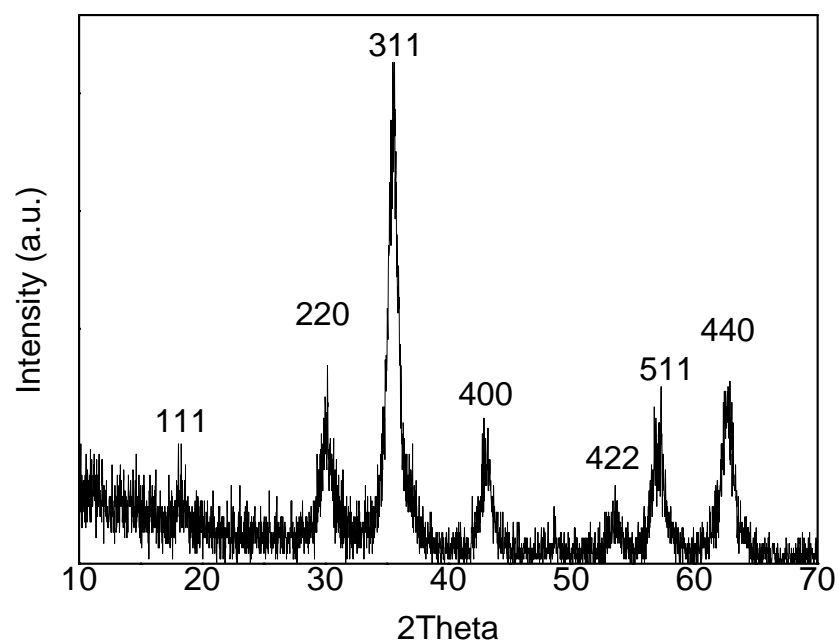

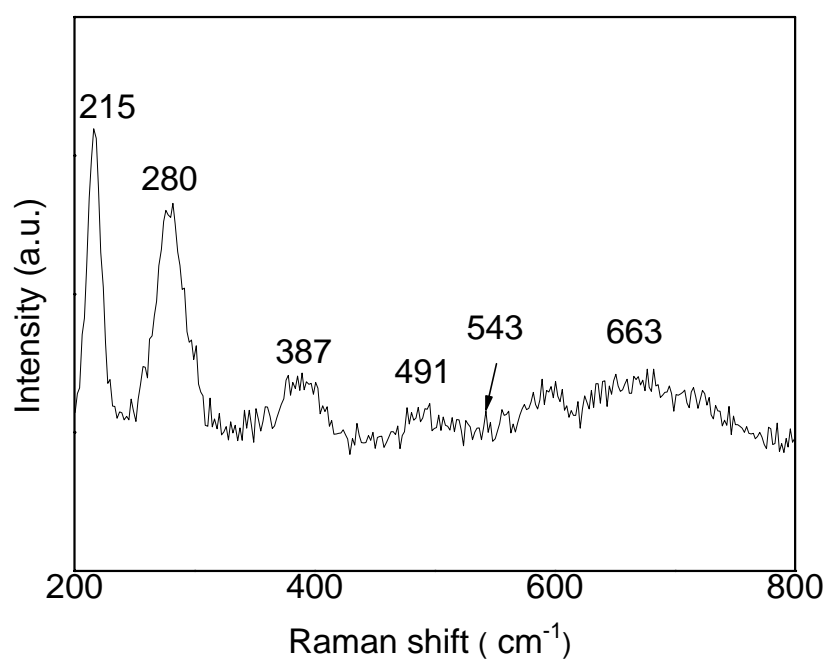

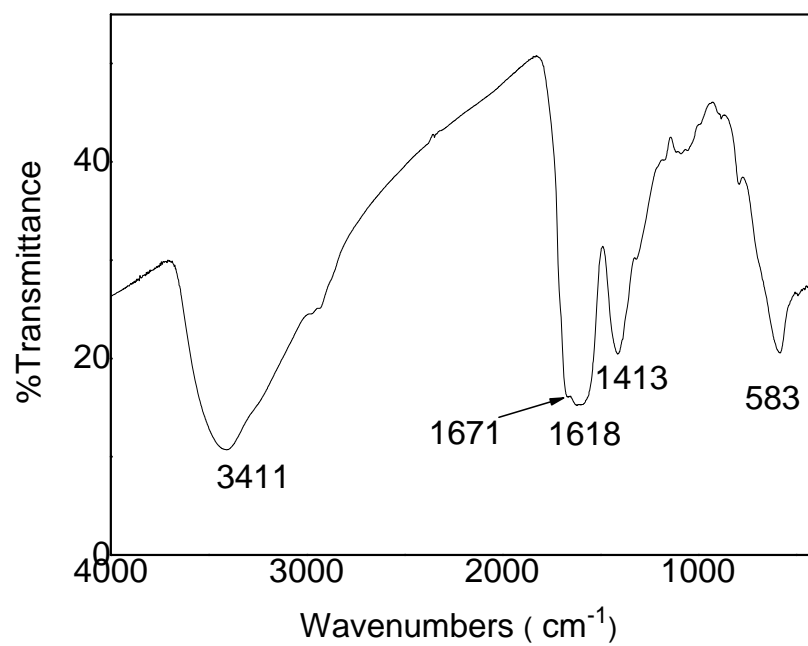

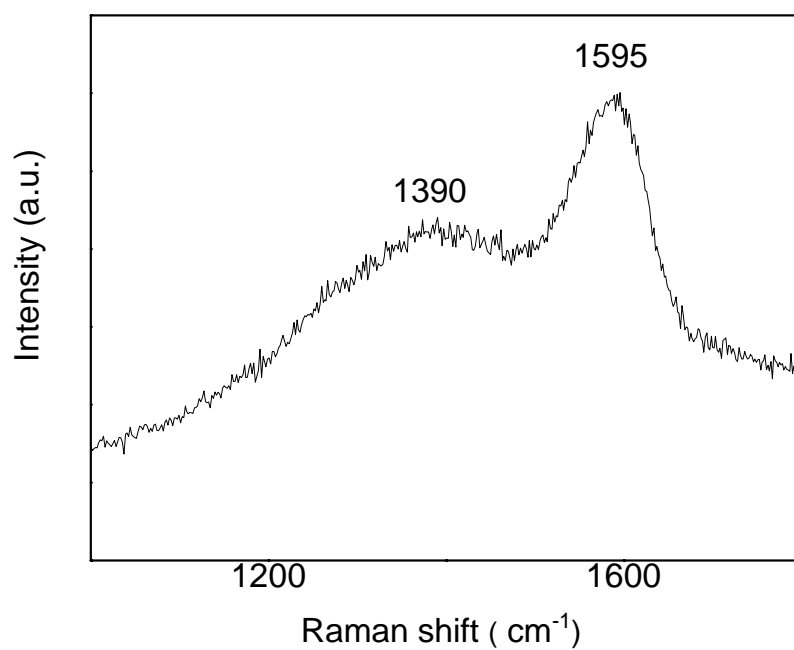

Supplement: c0dt00621a.pdf [file c0dt00621a.pdf]
